# Supplementary material for: Self-Prescribed Dietary Restrictions are Common in Inflammatory Bowel Disease Patients and Are Associated with Low Bone Mineralization
Source: Medicina (Kaunas). 2019 Aug 20;55(8):507. doi: 10.3390/medicina55080507 (PMC6722983; doi:10.3390/medicina55080507)
Supplement: Supplementary file 1 [file medicina-55-00507-s001.pdf]

Table S1. Questionnaire on dietary habits (Part three of the survey).

---

**Through administration of this questionnaire, we may evaluate beliefs and dietary practices among IBD patients. Please, mark the appropriate box with an X.**

---

1. Do you believe that your dietary habits can cause weakness, malnutrition or nutrient deficiencies? Yes ☐ No ☐
2. Do you take vitamin supplements and / or mineral salts? Yes ☐ No ☐
3. Do you take alternative therapies or herbal medicines for your intestinal disease? Yes ☐ No ☐
4. Do you take food supplements? Yes ☐ No ☐
5. Do you take probiotic supplements? Yes ☐ No ☐
6. Do you believe that food was the trigger for your intestinal disease? Yes ☐ No ☐
7. Do you think that eating habits have a more important role than drugs in controlling your intestinal disease? Yes ☐ No ☐
8. Do you think your intestinal disease affects appetite and eating pleasure? Yes ☐ No ☐
9. Do you share the same menu as other family members? Yes ☐ No ☐
10. Do you refuse to eat out for fear of having a relapse? Yes ☐ No ☐
11. Did you change your diet after diagnosing your IBD? Yes ☐ No ☐
12. Do you tend to avoid certain foods? Yes ☐ No ☐
13. Do some foods improve symptoms during a recurrence of your IBD? Yes ☐ No ☐
14. Have you received advice on your diet from medical personnel? Yes ☐ No ☐
15. Would you like to receive more nutritional advice? Yes ☐ No ☐

---

**Table S2.** Food Frequency Questionnaire (part two of the survey) [Montomoli M. Gonnelli S. Giacchi M. et al. Validation of a food frequency questionnaire for nutritional calcium intake assessment in Italian women. Eur J Clin Nutr. 2002;56(1);21–30].

**1 – DO YOU DRINK MILK** (except SOIA milk)? Yes ☐ No ☐  
*how much?*      **A**-one glass (100ml) ☐      **B**-one mug (250 ml) ☐      **C**-two mugs (500 ml) ☐  
*how many times per week?* .....

**2 – DO YOU EAT YOGURT?** Yes ☐ No ☐  
*how much?*      **A**-one pottle (125g) ☐      **B**-two pottles (250 g) ☐      **C**-one wrapping of 500g ☐  
*how many times per week?* .....

**3 – DO YOU EAT CHEESE?** Yes ☐ No ☐  
*how many times per week?* .....  
**which kind?:**

**3.1 HARD CHEESE** (Parmigiano, Grana, ...)? Yes ☐ No ☐  
*how much?*      **A**-small serving (40g) ☐      **B**-medium serving (80g) ☐      **C**-large serving (120g) ☐  
*how many times per week?* .....

**3.2 SEMI-HARD CHEESE** (Emmenthal, Provolone, ...)? Yes ☐ No ☐  
*how much?*      **A**-small serving (40g) ☐      **B**-medium serving (80g) ☐      **C**-large serving (120g) ☐  
*how many times per week?* .....

**3.3 SOFT CHEESE** (Mozzarella, Stracchino, ...)? Yes ☐ No ☐  
*how much?*      **A**-small serving (40g) ☐      **B**-medium serving (80g) ☐      **C**-large serving (120g) ☐  
*how many times per week?* .....

**3.4 BUTTER MILK CURD?** Yes ☐ No ☐  
FROM SHEEP? ☐      FROM COW? ☐  
*how much?*      **A**-small serving (50g) ☐      **B**-medium serving (100g) ☐      **C**-large serving (200g) ☐  
*how many times per week?* .....

**4 – DO YOU EAT PASTA or RICE?** Yes ☐ No ☐  
*how much?*      **A**-small serving (50g) ☐      **B**-medium serving (100g) ☐      **C**-large serving (150g) ☐  
*how many times per week?* .....  
- AND WITH HOW MANY TEASPOONS OF **PARMIGIANO/GRANA?**  
**A**-none ☐      **B**-1 teaspoon (5g) ☐      **C**-2 teaspoons (10g) ☐      **D**-3 teaspoons (15g) ☐

**5 – DO YOU EAT BREAD** or similar (crackers, bread-stick, ...)? Yes ☐ No ☐  
*how much per day?*      **A**-100 g (=2 rosette) ☐      **B**-200 g ☐      **C**-300 g ☐  
*how many times per week?* .....

6 – DO YOU EAT **POTATOES**? Yes ☐ No ☐

how many? A-small serving (200g=2 medium potatoes) ☐  
B-medium serving (400g) ☐  
C-large serving (600g) ☐

How many times per week? .....

7 – DO YOU EAT **MEAT OR FISH**? Yes ☐ No ☐

how much? A-small serving (100g) ☐ B-medium serving (150g) ☐ C-large serving (200g) ☐  
how many times per week? .....

8 – DO YOU EAT **EGGS**? Yes ☐ No ☐

how many eggs per week? .....

9 – DO YOU EAT **LEGUMES** (beans, peas,...)? Yes ☐ No ☐

how many? A-small serving (80 g cooked – 1/3 of a tin ) ☐  
B-medium serving (150 g cooked –half tin ) ☐  
C-large serving (250 g a cooked– a tin) ☐

How many times per week? .....

10 – DO YOU EAT **VEGETABLES**? Yes ☐ No ☐

how many? A-small serving (100 g) ☐ B-medium serving (200 g) ☐ C-large serving (300 g) ☐  
how many times per week? .....

11 – DO YOU EAT **FRESH FRUITS**? Yes ☐ No ☐

how many per week? .....

12 – DO YOU EAT **ICE CREAM with milk** (except sorbet)? Yes ☐ No ☐

how much? A-small serving (50 g) ☐ B-medium serving (100 g) ☐ C-large serving (150 g) ☐

how many per week? .....

13 – DO YOU EAT **milk or white CHOCOLATE**? Yes ☐ No ☐

how much? A-small serving (25 g) ☐ B-medium serving (50 g) ☐ C-large serving (100 g) ☐

how many times per week? .....

14 – DO YOU DRINK **TAP'S WATER**? Yes ☐ No ☐

how much per day? 0,500 l ☐ 0,750 l ☐ 1l ☐ 1,5 l ☐ 2 l ☐ 2,5l ☐

how many times per week? ... ..

15 – DO YOU DRINK **CALCIUM RICH MINERAL WATER**? Yes ☐ No ☐

how much per day? 0,500 l ☐ 0,750 l ☐ 1l ☐ 1,5 l ☐ 2 l ☐ 2,5l ☐

how many times per week? .....
